# Supplementary figures and images for: Investigation of the Hydration Behavior of Different Sugars by Time Domain-NMR
Source: MDPI journal article supplement (doi:10.3390/foods11081148), 2022-04-15

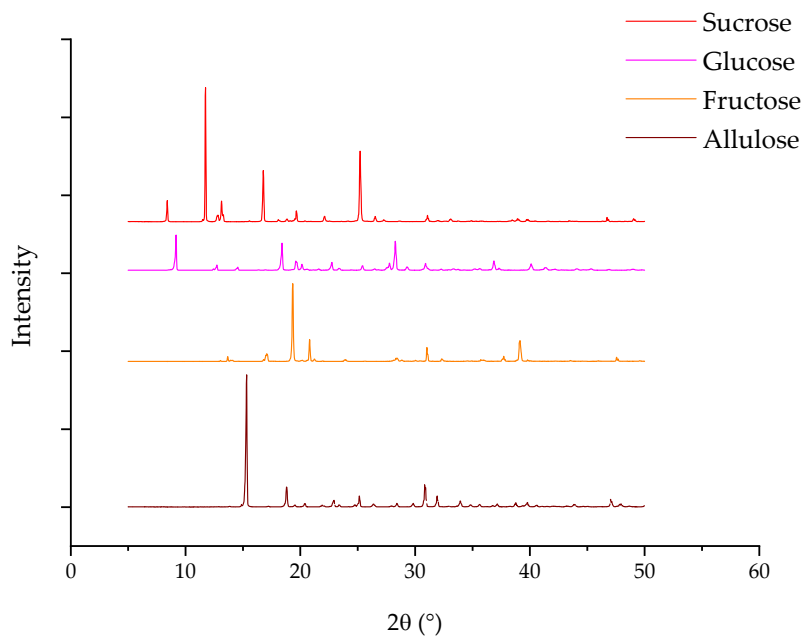

**Figure S1.** X-ray Diffraction (XRD) spectrum of sugars in solid form.

Supplement: s1 [file s1]
